# Supplementary material for: Hierarchical triphase diffusion photoelectrodes for photoelectrochemical gas/liquid flow conversion
Source: PubMed Central journal article supplement (PMC10167308; doi:10.1038/s41467-023-38138-9), 2023-05-08
Supplement: 41467_2023_38138_MOESM3_ESM.pdf [file 41467_2023_38138_MOESM3_ESM.pdf]

## **Description of Additional Supplementary Files**

File Name: Supplementary Movie 1

Description: 5,000-cycling bending test of TiO<sub>2</sub>/ZnWO<sub>4</sub> fibrous mat.
